# Supplementary material for: DOTA analogues with a phosphinate-iminodiacetate pendant arm: modification of the complex formation rate with a strongly chelating pendant
Source: Royal Society of Chemistry journal article supplement (doi:10.1039/c7dt01797a), 2017-01-01

## DOTA analogue with phosphinate-iminodiacetate pendant arm: modification of complex formation rate with a strongly chelating pendant

Soňa Procházková, Vojtěch Kubíček,\* Zuzana Böhmová, Kateřina Holá, Jan Kotek and Petr Hermann

Department of Inorganic Chemistry, Faculty of Science, Charles University, Hlavova 2030, 128 40 Prague 2, Czech Republic; email: [kubicek@natur.cuni.cz](mailto:kubicek@natur.cuni.cz); tel.: +420 221951436; fax: +420 22191253

### Table of content

Potentiometry - the detailed procedure

Figure S1.  $^1\text{H}$ ,  $^{13}\text{C}\{^1\text{H}\}$  and  $^{31}\text{P}\{^1\text{H}\}$  NMR spectra of  $\text{H}_6\text{do3aP}^{\text{ida}}$ .

Table S1. The experimentally determined overall protonation constants  $\log\beta_n^a$  of  $\text{H}_6\text{do3aP}^{\text{ida}}$  and the pre-formed  $[\text{Ln}(\text{do3aP}^{\text{ida}})]^{3-}$  complexes.

Table S2. The experimentally determined overall stability constants  $\log\beta_{\text{hlm}}^a$  of the  $\text{H}_6\text{do3aP}^{\text{ida}}$  complexes.

Table S3. Comparison of the stability constants  $\log K_{011}^a$  of the discussed complexes.

Table S4. The overall stability constants  $\log K$  of the ternary complexes with pre-formed  $[\text{Gd}(\text{do3aP}^{\text{ida}})]^{3-}$  complex.

Table S5. Comparison of the consecutive stability constants  $\log K_{011}$  and  $\log K_{021}^a$  of the ternary complexes of  $[\text{Gd}(\text{do3aP}^{\text{ida}})]^{3-}$  with those of the complexes of  $\text{H}_2\text{ida}$ .

Figure S2.  $^{31}\text{P}$  NMR titration of  $\text{H}_6\text{do3aP}^{\text{ida}}$ .

Figure S3. Distribution diagram of  $\text{Cu}(\text{II})$ – $[\text{Gd}(\text{H}_n\text{do3aP}^{\text{ida}})]^{n-3}$  system.

Figure S4. Distribution diagram of  $\text{Eu}(\text{III})$ – $[\text{Gd}(\text{H}_n\text{do3aP}^{\text{ida}})]^{n-3}$  system.

Table S6. Experimental data of the reported crystal structures.

Table S7. The coordination distances found in the crystal structure of  $[\text{Cu}_4(\text{do3aP}^{\text{ida}})(\text{OH})(\text{H}_2\text{O})_4]\text{Cl}\cdot 7.5\text{H}_2\text{O}$ .

Figure S5. The coordination mode of the Cu1 ion in the crystal structure of  $[\text{Cu}_4(\text{do3aP}^{\text{ida}})(\text{OH})(\text{H}_2\text{O})_4]\text{Cl}\cdot 7.5\text{H}_2\text{O}$ .

Figure S6. The coordination mode of the Cu2 ion in the crystal structure of  $[\text{Cu}_4(\text{do3aP}^{\text{ida}})(\text{OH})(\text{H}_2\text{O})_4]\text{Cl}\cdot 7.5\text{H}_2\text{O}$ .

Figure S7. The coordination mode of the Cu3 ion in the crystal structure of  $[\text{Cu}_4(\text{do3aP}^{\text{ida}})(\text{OH})(\text{H}_2\text{O})_4]\text{Cl}\cdot 7.5\text{H}_2\text{O}$ .

Figure S8. The coordination mode of the Cu4 ion in the crystal structure of  $[\text{Cu}_4(\text{do3aP}^{\text{ida}})(\text{OH})(\text{H}_2\text{O})_4]\text{Cl}\cdot 7.5\text{H}_2\text{O}$ .

Figure S9. UV-Vis spectra at the beginning of measurement, corresponding to the *out-of-cage* complex, and at the end of measurement, corresponding to the *in-cage* complex, performed under the 10-fold metal excess.

Figure S10. UV-Vis spectra at the beginning of measurement, corresponding to the *out-of-cage* complex and at the end of measurement, corresponding to the *in-cage* complex, performed under the 10-fold ligand excess.

Figure S11. Changes of absorption spectra in the course of complexation and time dependences of absorbance at 314 nm.

## Potentiometry - the detailed procedure

The stock solution of hydrochloric acid (~0.03 M) was prepared from 35 % aqueous solution (puriss, Fluka). Commercial (NMe<sub>4</sub>)Cl (99 %, Fluka) was recrystallized from boiling *i*-PrOH and the solid salt was dried over P<sub>2</sub>O<sub>5</sub> in vacuum to constant weight (this dried form of the salt is extremely hygroscopic). Carbonate-free (NMe<sub>4</sub>)OH solution (~0.2 M) was prepared from (NMe<sub>4</sub>)Cl using ion exchanger Dowex 1 in the OH<sup>-</sup>-form (elution with carbonate-free water, under argon). The hydroxide solution was standardized against potassium hydrogen phthalate and the HCl solution against the ca. 0.2 M (NMe<sub>4</sub>)OH solution. Stock solutions of the individual metal cations were prepared by dissolving hydrates of metal chlorides and the metal ions contents were determined by titration with a standard Na<sub>2</sub>H<sub>2</sub>edta solution. Analytical concentration of a stock solution of the ligand was determined together with refinement of protonation constants using OPIUM software package (see below). The in-cell titrations were carried out in a vessel thermostatted at 25.0 ± 0.1 °C, at ionic strength *I* = 0.1 M ((NMe<sub>4</sub>)Cl; with p*K*<sub>w</sub> = 13.81) and in the presence of extra HCl using a PHM 240 pH-meter, a 2-ml ABU 900 automatic piston burette and a GK 2401B combined electrode (all Radiometer, Denmark). The in-cell titrations were carried out in pH range 1.7–12.0 with at least 40 points per titration and four parallel titrations (*c*<sub>L</sub> = 0.004 M, *c*<sub>M</sub> = 0.004 M or 0.002 M or 0.008 M).

The stability constants of the Ln(III) complexes were obtained by the out-of-cell method. The batches (starting volume 1 ml) were prepared under Ar stream in tubes with ground joints from ligand, metal ion and HCl/(NMe<sub>4</sub>)Cl stock solutions and water (*c*<sub>L</sub> = *c*<sub>M</sub> ~ 0.004 M, 5% ligand excess). Then a known amount of (NMe<sub>4</sub>)OH standard solution was added under Ar. The tubes were firmly closed with stoppers and the solutions were equilibrated at room temperature for 4 weeks (one batch was checked after 6 weeks and gave the same data). Titrations were performed in the pH ranges 1.5–3.8 (final pH values) with around 20 data points per whole titration and three titrations per system.

The pre-formed Ln(III) complexes in solution were obtained by mixing of the ligand stock solution (5 % molar excess) with Ln(III) ion stock solution in a glass ampoule and a slow portion-wise addition (2 h) of standard (NMe<sub>4</sub>)OH solution (just to neutralize the ligand amount) under Ar. The ampoule was flame-sealed and left at 80 °C overnight to fully complex the metal ion. The ampoules were opened under Ar and aliquots of the solutions of the Ln(III) complexes were transferred into a titration vessel. Water and excess of HCl, metal ion stock solution and (NMe<sub>4</sub>)Cl solutions were added (to reach a pH of about 1.8 and *I* = 0.1 M (NMe<sub>4</sub>)Cl in the final solution, starting volume 5 ml, the preformed complex concentration ~0.004 M) and the solution was immediately titrated with a standard (NMe<sub>4</sub>)OH solution at 25.0 °C acquiring at least 40 data points per each of three titrations.

The constants (with standard deviations) were calculated with program OPIUM.<sup>1</sup> The program minimizes the criterion of the generalized least-squares method using the calibration function

$$E = E_0 + S \times \log[\text{H}^+] + j_1 \times [\text{H}^+] + j_2 \times K_w / [\text{H}^+]$$

where the additive term *E*<sub>0</sub> contains the standard potentials of the electrodes used and contributions of inert ions to the liquid-junction potential, *S* corresponds to the Nernstian slope, the value of which should be close to the theoretical value and the *j*<sub>1</sub>[H<sup>+</sup>] and *j*<sub>2</sub>[OH<sup>-</sup>] terms are the contributions of the H<sup>+</sup> and OH<sup>-</sup> ions to the liquid-junction potential. The calibration parameters were determined from titration of standard HCl with standard (NMe<sub>4</sub>)OH before and after

---

<sup>1</sup> Kývala, M.; Lukeš, I. *International Conference, Chemometrics '95*; Pardubice, Czech Republic, 1995; p 63; full version of "OPIUM" is available (free of charge) on <http://www.natur.cuni.cz/~kyvala/opium.html>.

each ligand or ligand–metal titration to give pairs of calibration/titration, which was used for calculations of the constants. The overall protonation constants  $\beta_n$  are concentration constants, defined by  $\beta_n = [H_nL]/([H]_n[L])$  (they were transformed to dissociation constants as  $pK_1 = \log\beta_1$  and  $pK_n = \log\beta_n - \log\beta_{n-1}$ ). The (concentration) stability constant are defined by  $\beta_{hlm} = [H_nL_lM_m]/([H]^h[L]^l[M]^m)$ .

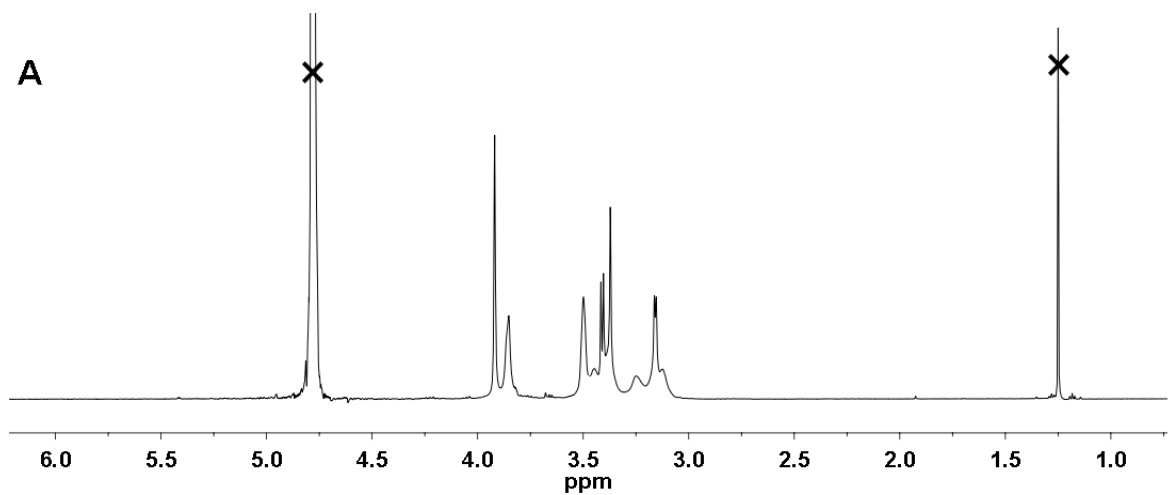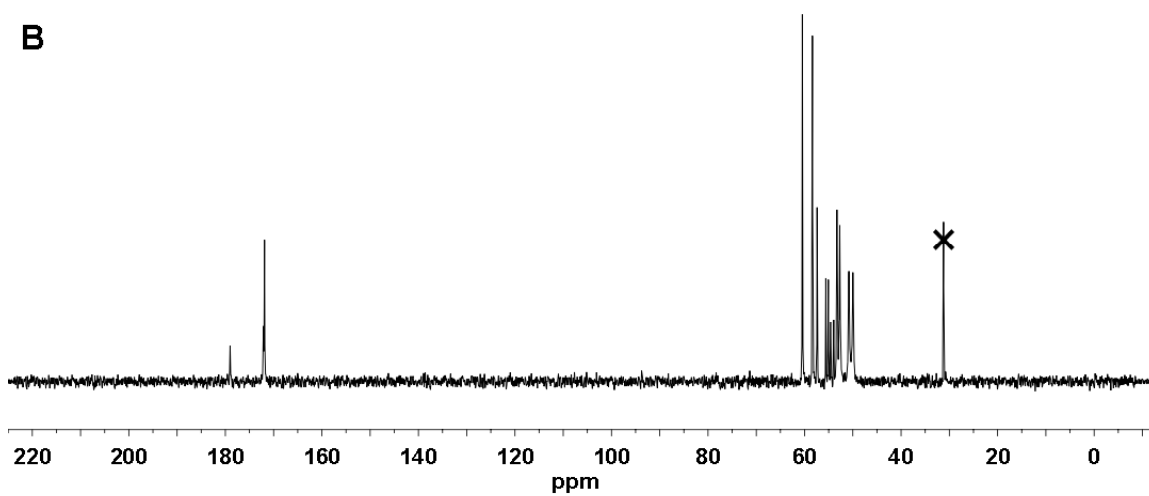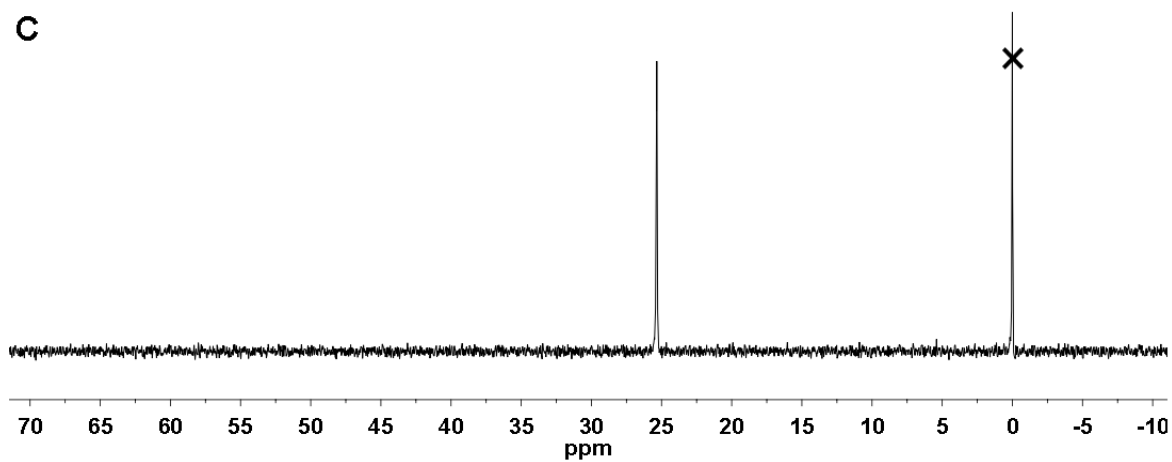

Figure S1.  $^1\text{H}$  (A),  $^{13}\text{C}\{^1\text{H}\}$  (B) and  $^{31}\text{P}\{^1\text{H}\}$  (C) NMR spectra of  $\text{H}_6\text{do3aP}^{\text{ida}}$  (25 °C, pD = 6). Signals of solvent and standards are labeled with crosses.

Table S1. The experimentally determined overall protonation constants  $\log\beta_h^a$  of  $\text{H}_6\text{do3aP}^{\text{ida}}$  and the pre-formed  $[\text{Ln}(\text{do3aP}^{\text{ida}})]^{3-}$  complexes (25 °C,  $I = 0.1 \text{ M (NMe}_4\text{)Cl}$ ).

| $h$ | $\text{H}_6\text{do3aP}^{\text{ida}}$ | $[\text{La}(\text{do3aP}^{\text{ida}})]^{3-}$ | $[\text{Nd}(\text{do3aP}^{\text{ida}})]^{3-}$ | $[\text{Eu}(\text{do3aP}^{\text{ida}})]^{3-}$ | $[\text{Gd}(\text{do3aP}^{\text{ida}})]^{3-}$ | $[\text{Y}(\text{do3aP}^{\text{ida}})]^{3-}$ |
|-----|---------------------------------------|-----------------------------------------------|-----------------------------------------------|-----------------------------------------------|-----------------------------------------------|----------------------------------------------|
| 1   | 12.85(4)                              | 7.67(2)                                       | 7.83(3)                                       | 7.83(1)                                       | 7.79(2)                                       | 7.95(1)                                      |
| 2   | 22.48(4)                              | 10.25(3)                                      | 10.29(4)                                      | 10.23(1)                                      | 10.53(2)                                      | 10.52(1)                                     |
| 3   | 30.61(4)                              | 11.88(3)                                      | 11.80(4)                                      | 11.82(1)                                      | 12.09(2)                                      | 12.29(1)                                     |
| 4   | 35.01(4)                              | –                                             | –                                             | –                                             | –                                             | –                                            |
| 5   | 38.28(4)                              | –                                             | –                                             | –                                             | –                                             | –                                            |
| 6   | 40.26(5)                              | –                                             | –                                             | –                                             | –                                             | –                                            |
| 7   | 41.85(5)                              | –                                             | –                                             | –                                             | –                                             | –                                            |

<sup>a</sup> For the free ligand,  $\beta_h = [\text{H}_h\text{L}] / ([\text{H}]^h \times [\text{L}])$ . For the pre-formed complexes,  $\beta_h = [\text{H}_h(\text{ML})] / ([\text{H}]^h \times [\text{ML}])$ .

Table S2. The experimentally determined overall stability constants  $\log\beta_{hlm}^a$  of the  $\text{H}_6\text{do3aP}^{\text{ida}}$  complexes (25 °C,  $I = 0.1 \text{ M (NMe}_4\text{)Cl}$ ).

| Species <sup>b</sup>                   | Cu(II)   | Zn(II)   | La(III)            | Nd(III)            | Eu(III)            | Gd(III)            | Y(III)             |
|----------------------------------------|----------|----------|--------------------|--------------------|--------------------|--------------------|--------------------|
| [M(L)]                                 | 23.75(3) | 21.79(2) | 22.09 <sup>c</sup> | 24.02 <sup>c</sup> | 24.94 <sup>c</sup> | 25.27 <sup>c</sup> | 25.39 <sup>c</sup> |
| [M(HL)]                                | 32.15(2) | 30.25(1) | 29.76(3)           | 31.85(3)           | 32.77(3)           | 33.06(9)           | 33.34(5)           |
| [M(H <sub>2</sub> L)]                  | 35.99(2) | 34.01(2) | 32.96(5)           | 34.79(2)           | 35.72(2)           | 35.66(9)           | 35.74(7)           |
| [M(H <sub>3</sub> L)]                  | –        | 36.99(1) | 36.19(2)           | 37.01(3)           | 37.99(3)           | 37.79(11)          | 37.94(7)           |
| [M <sub>2</sub> (L)]                   | 34.71(3) | 31.37(1) | <i>d</i>           | <i>d</i>           | <i>d</i>           | <i>d</i>           | <i>d</i>           |
| [M <sub>2</sub> (HL)]                  | 38.71(2) | 35.05(1) | <i>d</i>           | <i>d</i>           | <i>d</i>           | <i>d</i>           | <i>d</i>           |
| [M <sub>2</sub> (H <sub>2</sub> L)]    | 40.30(3) | –        | <i>d</i>           | <i>d</i>           | <i>d</i>           | <i>d</i>           | <i>d</i>           |
| [M <sub>2</sub> (L)(OH)]               | 25.51(3) | 21.20(2) | <i>d</i>           | <i>d</i>           | <i>d</i>           | <i>d</i>           | <i>d</i>           |
| [M <sub>2</sub> (L)(OH) <sub>2</sub> ] | 13.46(4) | –        | <i>d</i>           | <i>d</i>           | <i>d</i>           | <i>d</i>           | <i>d</i>           |

<sup>a</sup>  $\beta_{hlm} = [\text{H}_h\text{L}_l\text{M}_m] / ([\text{H}]^h \times [\text{L}]^l \times [\text{M}]^m)$ . <sup>b</sup> Charges are omitted for clarity reasons. <sup>c</sup> Calculated using the protonation constants determined for the pre-formed complexes. <sup>d</sup> The systems were studied by out-of-cell method and, thus, only in 1:1 metal-to-ligand ratio was utilized.

Table S3. Comparison of the stability constants  $\log K_{011}^a$  of the discussed complexes.

| Ligand                                           | Cu(II) | Zn(II) | La(III) | Nd(III) | Eu(III) | Gd(III) | Y(III) |
|--------------------------------------------------|--------|--------|---------|---------|---------|---------|--------|
| H <sub>4</sub> dota <sup>2</sup>                 | 22.3   | 20.8   | 22.0    | 23.7    | 23.0    | 24.0    | 24.0   |
| H <sub>6</sub> do3aP <sup>ida</sup>              | 23.75  | 21.79  | 22.09   | 24.02   | 24.94   | 25.27   | 25.39  |
| H <sub>5</sub> do3aP <sup>PrA</sup> <sup>3</sup> | –      | –      | 23.1    | –       | 25.3    | 25.04   | 24.63  |

<sup>a</sup>  $K_{011} = [M(L)] / ([L] \times [M])$ .

Table S4. The overall stability constants  $\log K$  of the ternary complexes with pre-formed  $[Gd(do3aP^{ida})]^{3-}$  complex (25 °C,  $I = 0.1$  M (NMe<sub>4</sub>)Cl).

| Equilibrium <sup>a</sup>                               | Cu(II)    | Zn(II)   | Ca(II)   | Eu(III)  |
|--------------------------------------------------------|-----------|----------|----------|----------|
| $M + \{Gd(L)\} = [M\{Gd(L)\}]$                         | 10.53(1)  | 8.10(3)  | 5.19(5)  | 8.98(2)  |
| $M + \{Gd(L)\} + H^+ = [M\{Gd(HL)\}]$                  | –         | –        | –        | 11.57(3) |
| $M + \{Gd(L)\} + H_2O = [M\{Gd(L)\}(OH)] + H^+$        | 1.47(3)   | –        | –6.69(5) | –        |
| $M + \{Gd(L)\} + 2H_2O = [M\{Gd(L)\}(OH)_2] + 2H^+$    | –10.15(4) | –        | –        | –        |
| $M + 2\{Gd(L)\} = [M\{Gd(L)\}_2]$                      | 15.40(7)  | 13.30(7) | –        | 16.31(8) |
| $M + 2\{Gd(L)\} + H^+ = [M\{Gd(HL)\}\{Gd(L)\}]$        | 20.95(4)  | 18.47(8) | –        | 20.61(2) |
| $M + 2\{Gd(L)\} + H_2O = [M\{Gd(L)\}_2(OH)] + H^+$     | 5.39(7)   | 2.59(9)  | –        | 6.0(1)   |
| $M + 2\{Gd(L)\} + 2H_2O = [M\{Gd(L)\}_2(OH)_2] + 2H^+$ | –         | –        | –        | –6.4(1)  |

<sup>a</sup> Charges are omitted for clarity reasons.

Table S5. Comparison of the consecutive stability constants  $\log K_{011}$  and  $\log K_{021}^a$  of the ternary complexes of  $[Gd(do3aP^{ida})]^{3-}$  with those of the complexes of H<sub>2</sub>ida.<sup>2</sup>

| Species <sup>b</sup> | Cu <sup>2+</sup>    |                    | Zn <sup>2+</sup>    |                    | Ca <sup>2+</sup>    |                    | Eu <sup>3+</sup>    |                    |
|----------------------|---------------------|--------------------|---------------------|--------------------|---------------------|--------------------|---------------------|--------------------|
|                      | $[Gd(do3aP^{ida})]$ | H <sub>2</sub> ida |
| [M(X)]               | 10.53               | 10.6               | 8.10                | 7.03               | 5.19                | 2.59               | 8.98                | 6.2                |
| [M(X) <sub>2</sub> ] | 4.87                | 5.7                | 5.20                | 5.4                | –                   | –                  | 7.33                | 4.5                |

<sup>a</sup>  $K_{011} = [M(X)] / ([X] \times [M])$  and  $K_{021} = [M(X)_2] / ([X] \times [M(X)])$ , where  $X = [Gd(do3aP^{ida})]^{3-}$  or  $X = ida^{2-}$ . <sup>b</sup> Charges are omitted for clarity reasons.

<sup>2</sup> A. E. Martell, R. M. Smith, *Critical Stability Constants*, Plenum Press, New York, 1974–1989, vol. 1–6; *NIST Standard Reference Database 46 (Critically Selected Stability Constants of Metal Complexes)*, version 5.0, 1994.

<sup>3</sup> M. Försterová, I. Svobodová, P. Lubal, P. Táborický, J. Kotek, P. Hermann, I. Lukeš *Dalton Trans.*, 2007, 535–549.

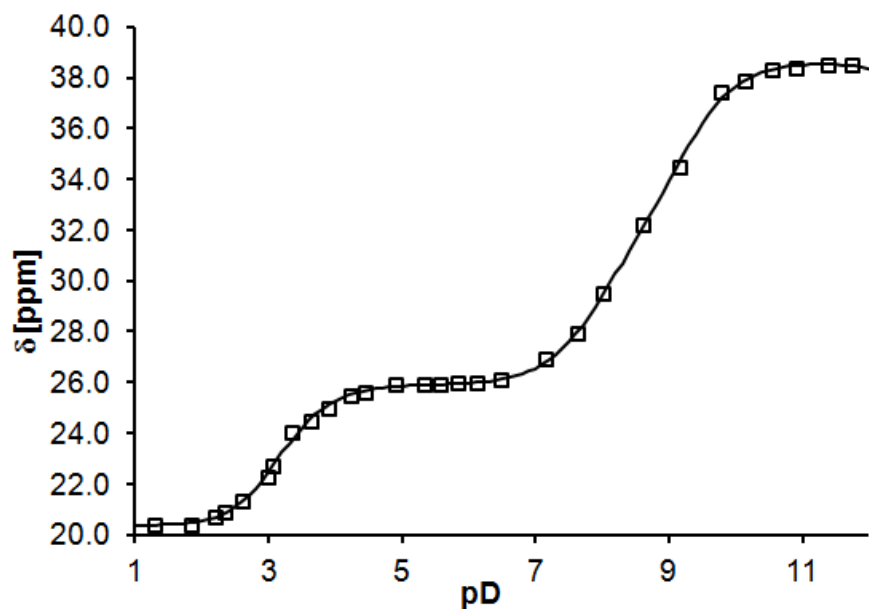

Figure S2.  $^{31}\text{P}$  NMR titration of  $\text{H}_6\text{do3aP}^{\text{ida}}$ .

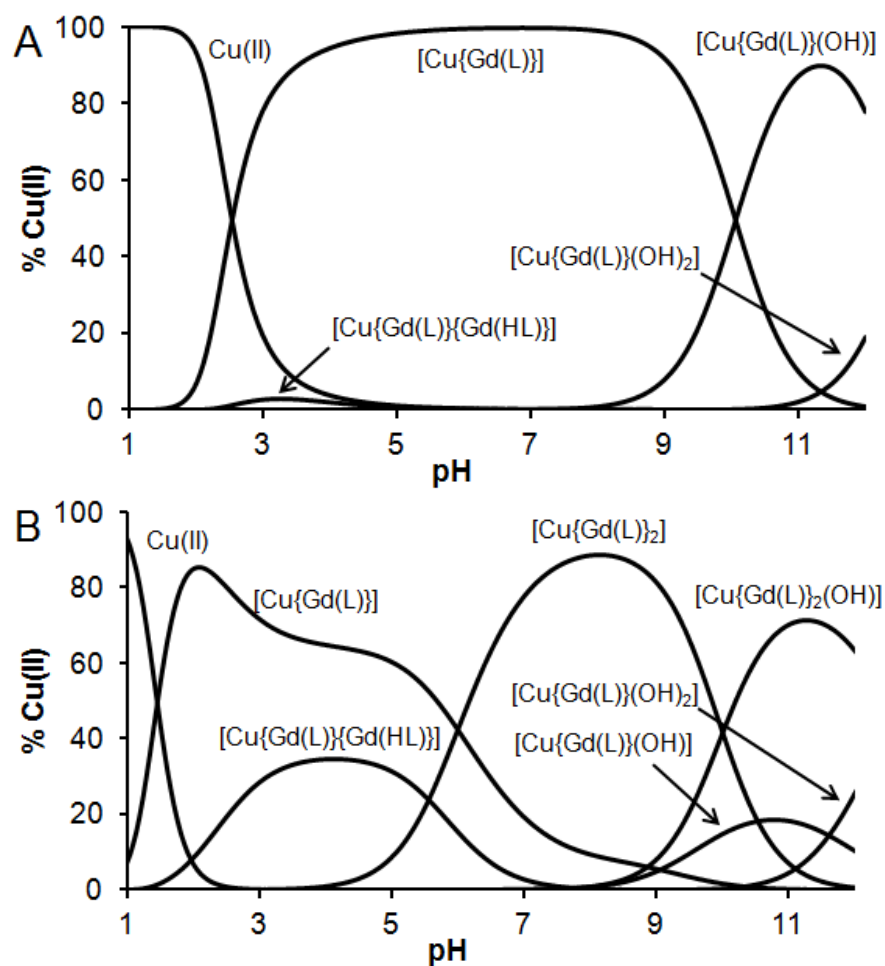

Figure S3. Distribution diagram of  $\text{Cu(II)}\text{-}[\text{Gd}(\text{H}_n\text{do3aP}^{\text{ida}})]^{n-3}$  system ( $25\text{ }^\circ\text{C}$ ,  $I = 0.1\text{ M}$   $(\text{NMe}_4)\text{Cl}$ ,  $c_{\text{GdL}} = 4\text{ mM}$ ,  $c_{\text{M}} = 4\text{ mM}$  (A)  $c_{\text{M}} = 2\text{ mM}$  (B)). Charges are omitted for clarity reasons.

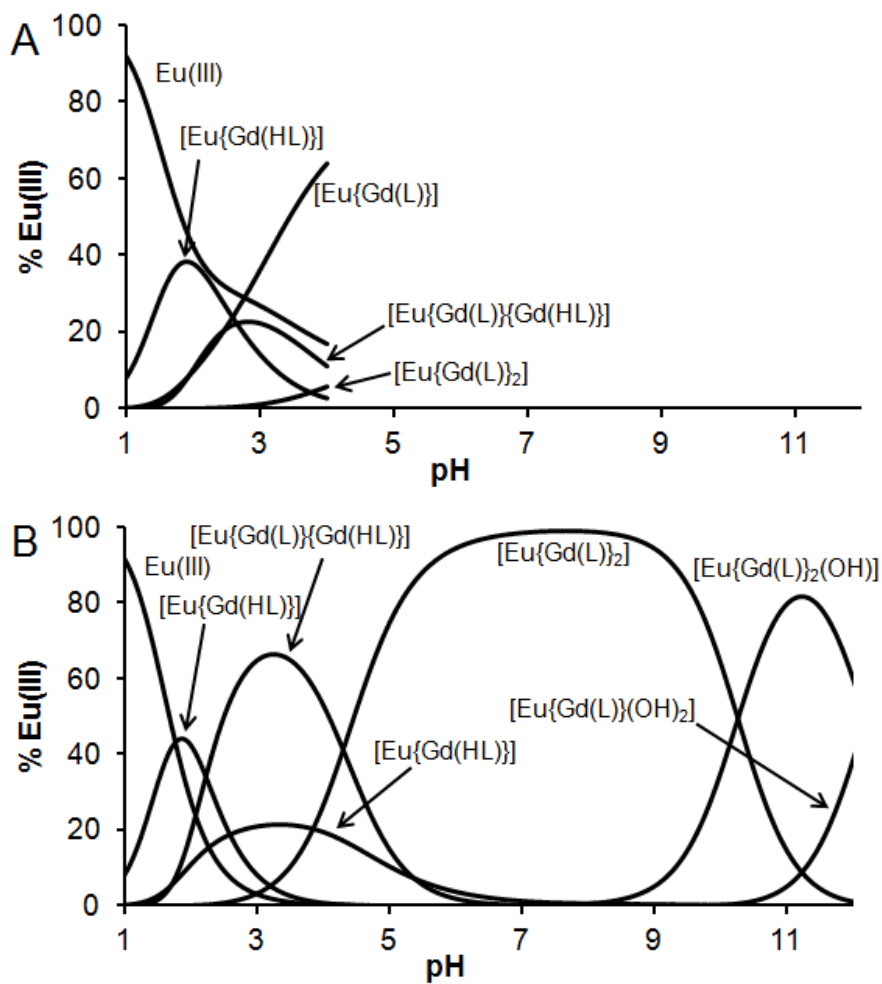

Figure S4. Distribution diagram of Eu(III)-[Gd(H<sub>7</sub>do3aP<sup>ida</sup>)]<sup>n-3</sup> system (25 °C, *I* = 0.1 M (NMe<sub>4</sub>)Cl, *c*<sub>GdL</sub> = 4 mM, *c*<sub>M</sub> = 4 mM (A) *c*<sub>M</sub> = 2 mM (B)). Charges are omitted for clarity reasons.



Table S6. Experimental data of the reported crystal structures.

| Compound                                                               | H <sub>6</sub> do3aP <sup>ida</sup> ·4H <sub>2</sub> O                             | [Cu <sub>4</sub> (do3aP <sup>ida</sup> )(OH)(H <sub>2</sub> O) <sub>4</sub> ]Cl·7.5H <sub>2</sub> O    |
|------------------------------------------------------------------------|------------------------------------------------------------------------------------|--------------------------------------------------------------------------------------------------------|
| Formula                                                                | C <sub>20</sub> H <sub>36</sub> N <sub>5</sub> O <sub>12</sub> P·4H <sub>2</sub> O | C <sub>20</sub> H <sub>39</sub> Cu <sub>4</sub> N <sub>5</sub> O <sub>17</sub> PCl·7.5H <sub>2</sub> O |
| <i>M<sub>r</sub></i>                                                   | 641.57                                                                             | 1077.26                                                                                                |
| Colour                                                                 | colorless                                                                          | blue                                                                                                   |
| Shape                                                                  | prism                                                                              | prism                                                                                                  |
| Dimensions (mm)                                                        | 0.35×0.13×0.10                                                                     | 0.30×0.25×0.21                                                                                         |
| Crystal system                                                         | triclinic                                                                          | triclinic                                                                                              |
| Space group                                                            | <i>P</i> <sub>-1</sub>                                                             | <i>P</i> <sub>-1</sub>                                                                                 |
| <i>a</i> (Å)                                                           | 9.5462(4)                                                                          | 12.0847(5)                                                                                             |
| <i>b</i> (Å)                                                           | 10.7017(7)                                                                         | 12.4493(5)                                                                                             |
| <i>c</i> (Å)                                                           | 16.0510(10)                                                                        | 12.9847(5)                                                                                             |
| $\alpha$ (°)                                                           | 100.877(2)                                                                         | 85.606(2)                                                                                              |
| $\beta$ (°)                                                            | 95.356(4)                                                                          | 78.603(2)                                                                                              |
| $\gamma$ (°)                                                           | 112.760(3)                                                                         | 86.931(2)                                                                                              |
| <i>V</i> (Å <sup>3</sup> )                                             | 1459.66(15)                                                                        | 1907.87(13)                                                                                            |
| <i>Z</i>                                                               | 2                                                                                  | 2                                                                                                      |
| <i>D<sub>c</sub></i> (g·cm <sup>-3</sup> )                             | 1.460                                                                              | 1.875                                                                                                  |
| $\mu$ (mm <sup>-1</sup> )                                              | 0.176                                                                              | 2.407                                                                                                  |
| <i>F</i> (000)                                                         | 684                                                                                | 1106                                                                                                   |
| Reflections unique; observed ( <i>I</i> <sub>0</sub> > 2σ( <i>I</i> )) | 5679; 3638                                                                         | 7764; 8790                                                                                             |
| Parameters                                                             | 388                                                                                | 523                                                                                                    |
| G-o-f on <i>F</i> <sup>2</sup>                                         | 1.057                                                                              | 1.125                                                                                                  |
| <i>R</i> ; <i>R'</i> (all data)                                        | 0.0728; 0.1119                                                                     | 0.0404; 0.0489                                                                                         |
| <i>wR</i> ; <i>wR'</i> (all data)                                      | 0.2071; 0.2370                                                                     | 0.0977; 0.1042                                                                                         |
| Difference max; min (e Å <sup>-3</sup> )                               | 1.329; 0.474                                                                       | 1.675; 1.146                                                                                           |

Table S7. The coordination distances found in the crystal structure of [Cu<sub>4</sub>(do3aP<sup>ida</sup>)(OH)(H<sub>2</sub>O)<sub>4</sub>]Cl·7.5H<sub>2</sub>O.

| Bond                 | Distance [Å] | Bond                  | Distance [Å] |
|----------------------|--------------|-----------------------|--------------|
| Cu1–N1               | 2.066(3)     | Cu2–O241              | 1.946(3)     |
| Cu1–N4               | 2.101(3)     | Cu2–O261              | 1.951(3)     |
| Cu1–N7               | 2.059(3)     | Cu2–N22               | 2.018(3)     |
| Cu1–N10              | 2.089(3)     | Cu2–O412 <sup>a</sup> | 1.930(3)     |
| Cu1–O311             | 2.489(2)     | Cu2–O1C               | 2.497(4)     |
| Cu1–O511             | 2.216(3)     | Cu2–O11               | 2.697(3)     |
| Bond                 | Distance [Å] | Bond                  | Distance [Å] |
| Cu3–O11              | 1.927(2)     | Cu4–O512 <sup>a</sup> | 1.919(3)     |
| Cu3–O311             | 1.972(2)     | Cu4–O312              | 1.939(3)     |
| Cu3–O2C              | 1.977(2)     | Cu4–O5C               | 2.005(3)     |
| Cu3–O2C <sup>b</sup> | 1.976(2)     | Cu4–O2C <sup>b</sup>  | 2.042(2)     |
| Cu3–O511             | 2.376(2)     | Cu4–O3C               | 2.268(3)     |
| Cu3–O3C              | 2.491(3)     | Cu4–O4C               | 2.412(3)     |

<sup>a</sup> Symmetrically-associated ligand molecule. <sup>b</sup> Symmetrically-associated hydroxido ligand.

Figure S5. The coordination mode of the Cu1 ion in the crystal structure of  $[\text{Cu}_4(\text{do3aP}^{\text{id}_a})(\text{OH})(\text{H}_2\text{O})_4]\text{Cl}\cdot 7.5\text{H}_2\text{O}$ . The hydrogen atoms attached to the carbon atoms are not displayed for the clarity reasons.

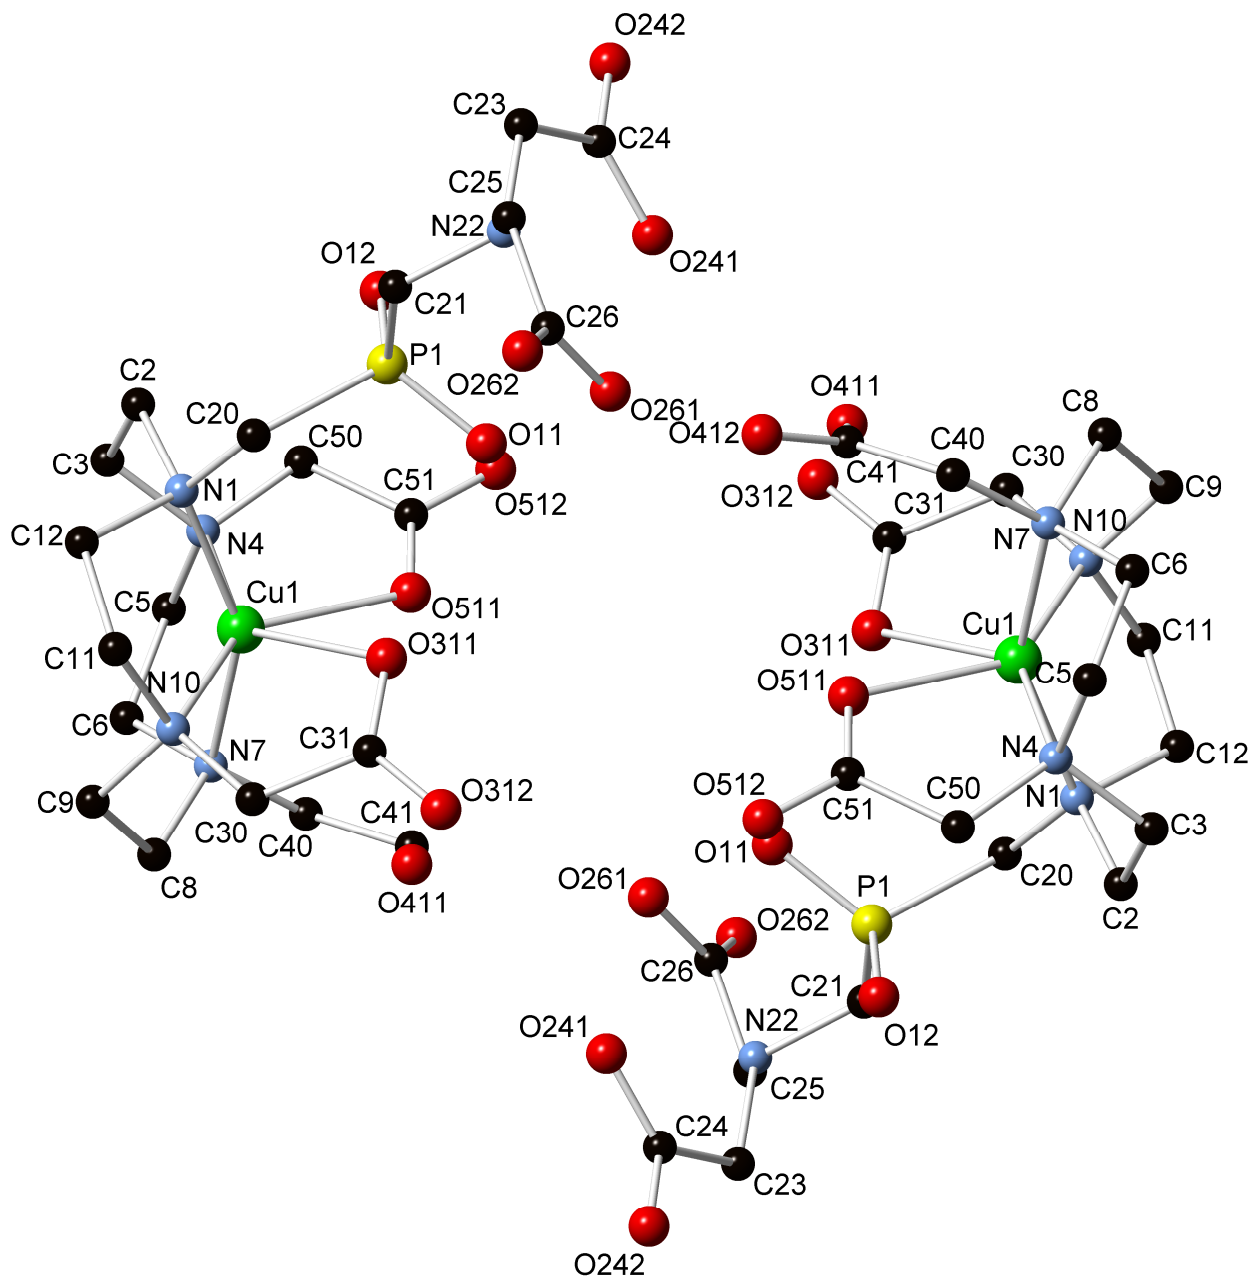





Figure S8. The coordination mode of the Cu<sub>4</sub> ion in the crystal structure of [Cu<sub>4</sub>(do3aP<sup>ida</sup>)(OH)(H<sub>2</sub>O)<sub>4</sub>]Cl·7.5H<sub>2</sub>O. The hydrogen atoms attached to the carbon atoms are not displayed for the clarity reasons.

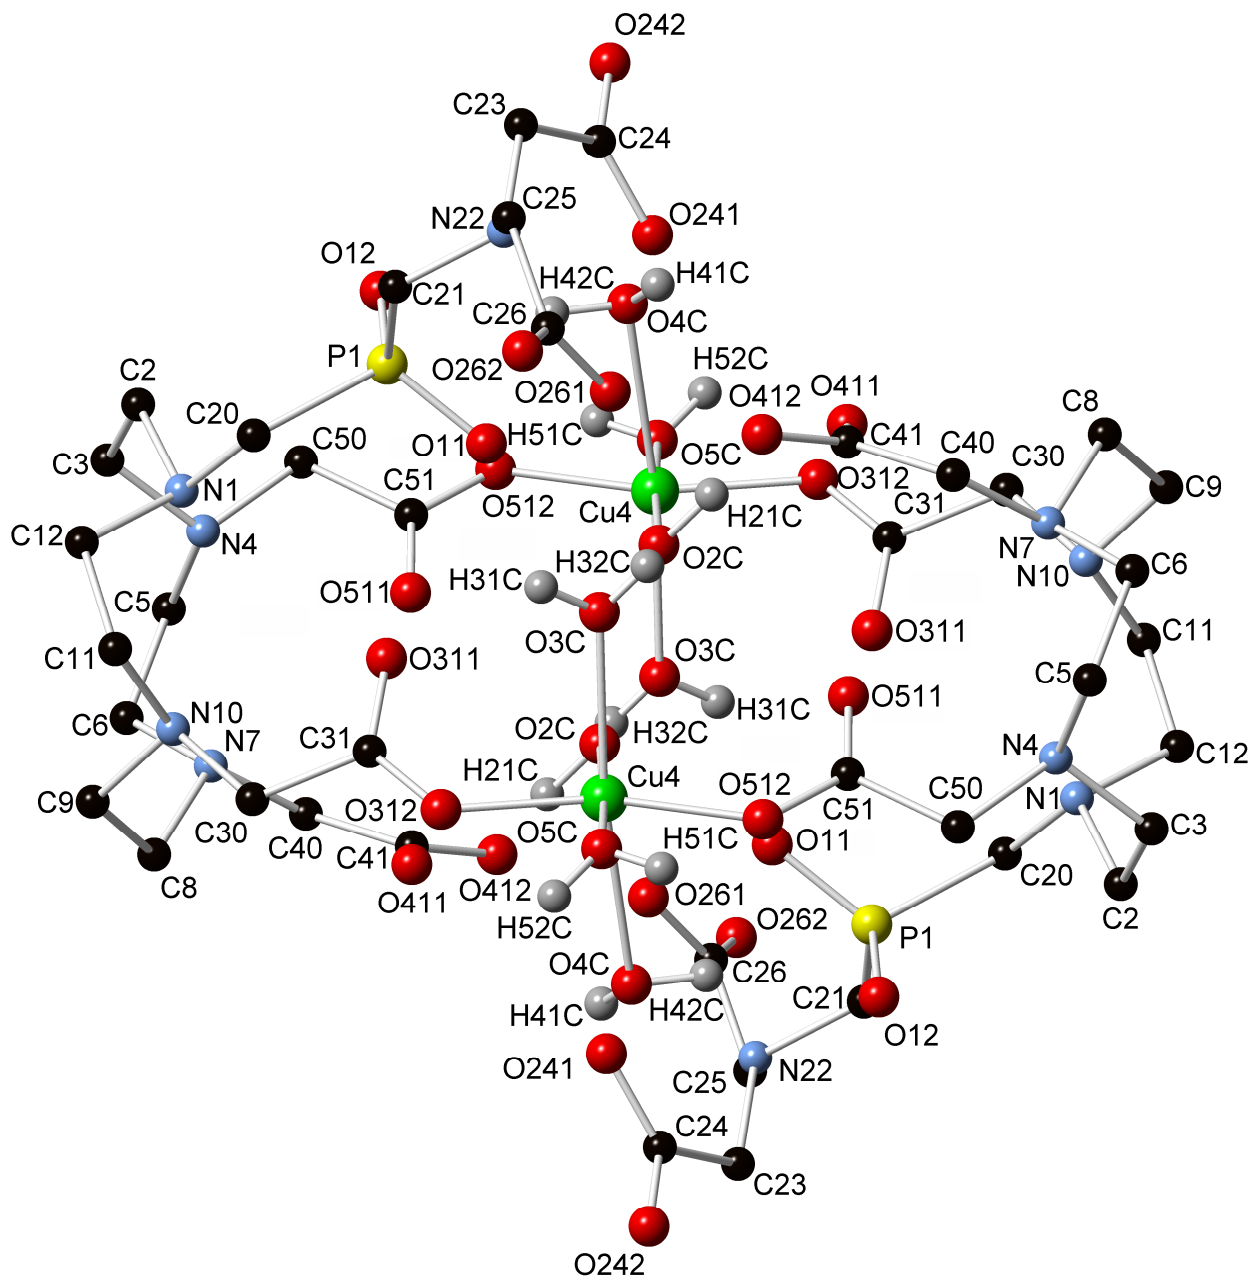

Figure S9. UV-Vis spectra at the beginning of measurement, corresponding to the *out-of-cage* complex (blue), and at the end of measurement, corresponding to the *in-cage* complex (red), performed under the 10-fold metal excess (pH = 6.5,  $c_{Ce} = 5.0 \cdot 10^{-3}$  M,  $c_L = 5.0 \cdot 10^{-4}$  M, 25 °C). The increasing absorbance at short wavelengths results from the Ce(III) ion excess. Similar spectra were observed along the whole studied pH range.

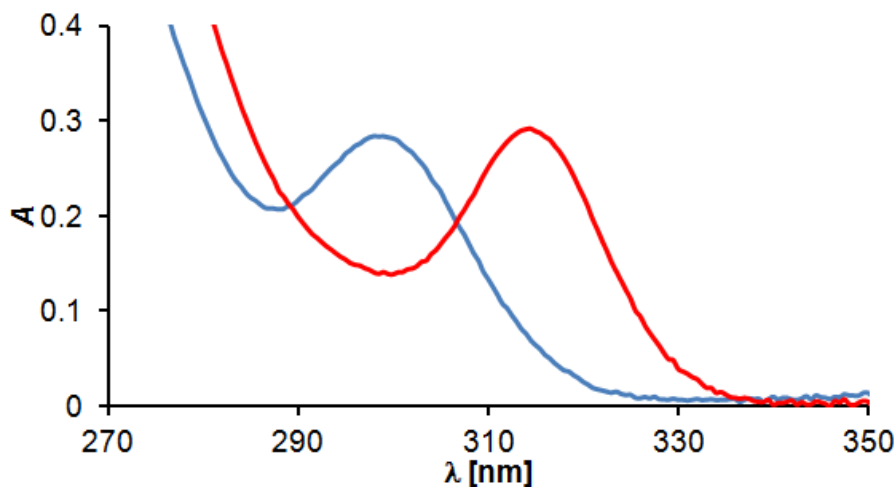

Figure S10. UV-Vis spectra at the beginning of measurement, corresponding to the *out-of-cage* complex (**A**, the spectra change with pH), and at the end of measurement, corresponding to the *in-cage* complex (**B**, pH = 6.5, similar spectra were observed along the whole studied pH range), performed under the 10-fold ligand excess ( $c_{Ce} = 5.0 \cdot 10^{-4}$  M,  $c_L = 5.0 \cdot 10^{-3}$  M, 25 °C).

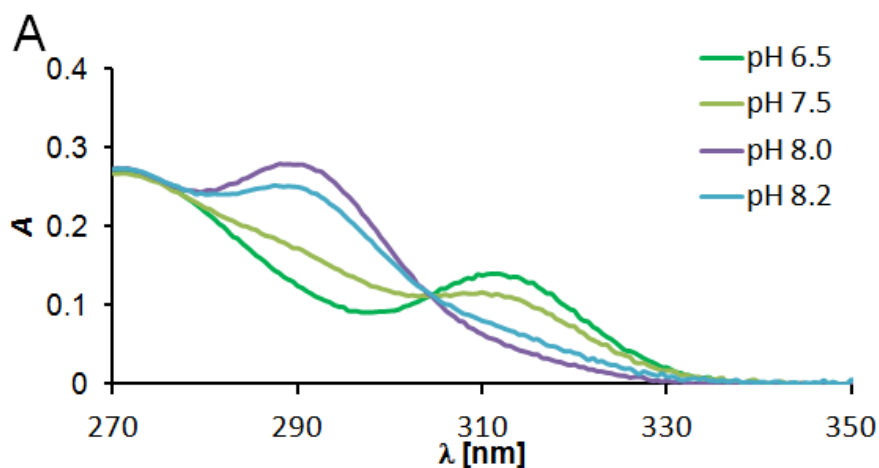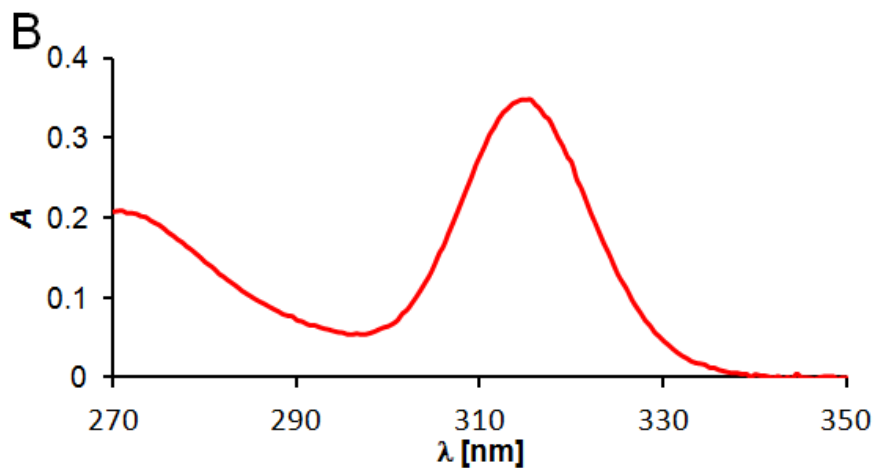

Figure S11. Changes of absorption spectra in the course of complexation (left, pH = 6, 25 °C) and time dependences of absorbance at 314 nm (right). The curves represent the best fit according to Equation 1. **A:**  $c_{Ce} = 5.0 \cdot 10^{-4}$  M,  $c_L = 5.0 \cdot 10^{-4}$  M; **B:**  $c_{Ce} = 5.0 \cdot 10^{-4}$  M,  $c_L = 5.0 \cdot 10^{-3}$  M; **C:**  $c_{Ce} = 5.0 \cdot 10^{-3}$  M,  $c_L = 5.0 \cdot 10^{-4}$  M.

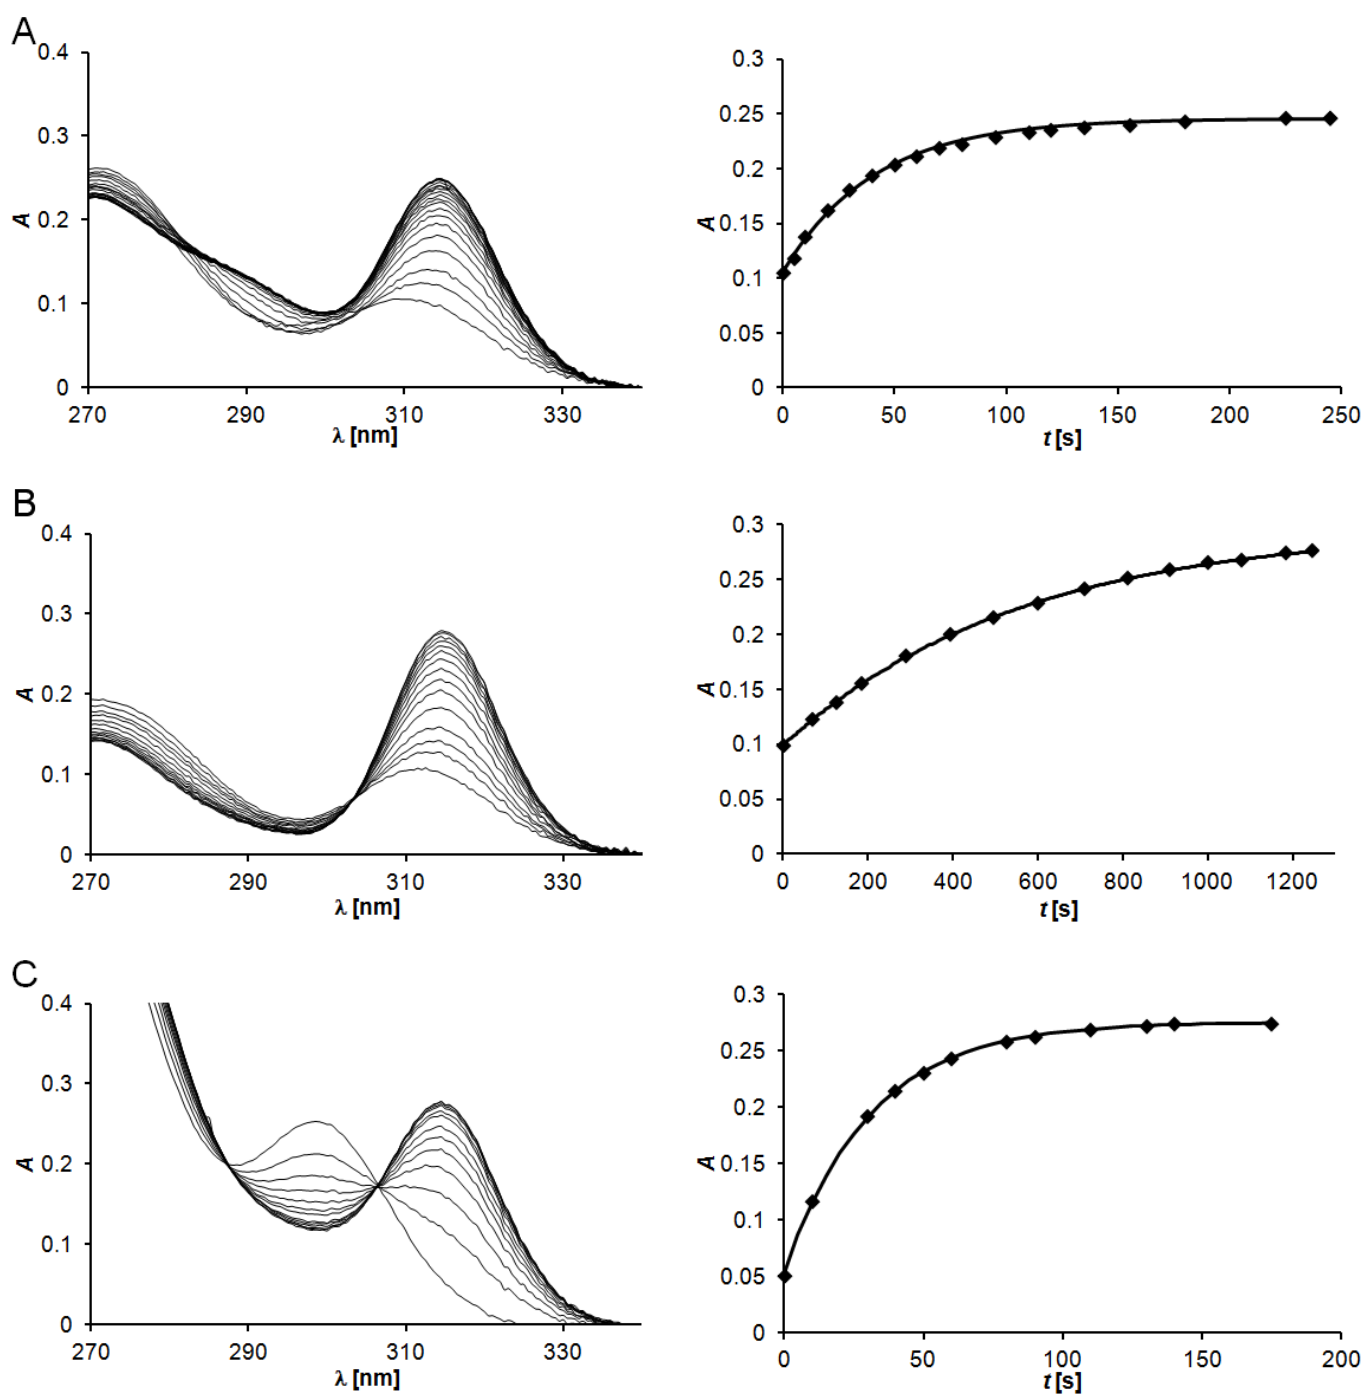

Supplement: c7dt01797a1.pdf [file c7dt01797a1.pdf]
